# Supplementary material for: Lifetime Physical Activity and the Risk of Non-Hodgkin Lymphoma
Source: Oxford University Press journal article supplement (doi:10.1158/1055-9965.epi-14-1303), 2015-04-30
Supplement: 10559965epi141303-sup-141305_1_supp_2848525_nj7svd.docx [file 10559965epi141303-sup-141305_1_supp_2848525_nj7svd.docx]

**Supplementary Table 1. Distribution of lifetime total, moderate-intensity and vigorous-intensity physical activity by sex and non-Hodgkin lymphoma subtype in a case-control study conducted in British Columbia, Canada, 2000-2004**

|  | **Sex** | | | | **NHL Subtype** | | | |
| --- | --- | --- | --- | --- | --- | --- | --- | --- |
|  | **Males** | | **Females** | | **Cases** | | | |
|  | **Controls (n=435)** | **Cases (n=441)** | **Controls (n=383)** | **Cases (n=308)** | **Diffuse large B-cell (n=202)** | **Follicular (n=188)** | **Other B-cell (n=268)** | **T-cell (n=70)** |
| **Lifetime Physical Activity** | **%** | **%** | **%** | **%** | **%** | **%** | **%** | **%** |
| **Total** |  |  |  |  |  |  |  |  |
| 0-35.9 MET-hours/week | 28.0 | 30.6 | 21.7 | 23.7 | 27.7 | 25.0 | 27.6 | 32.9 |
| 36-58.9 MET-hours/week | 25.3 | 23.1 | 25.6 | 20.5 | 19.3 | 24.5 | 23.9 | 18.6 |
| 59-84.9 MET-hours/week | 24.1 | 19.5 | 26.9 | 22.1 | 21.8 | 19.7 | 22.4 | 17.1 |
| 85+ MET-hours/week | 22.5 | 26.8 | 25.8 | 33.8 | 31.2 | 30.9 | 26.1 | 31.4 |
| **Moderate-intensity** |  |  |  |  |  |  |  |  |
| 0-18.9 MET-hours/week | 30.3 | 34.0 | 20.1 | 17.9 | 29.2 | 25.0 | 24.3 | 37.1 |
| 19-35.9 MET-hours/week | 31.3 | 27.2 | 17.0 | 16.9 | 19.8 | 22.3 | 27.2 | 22.9 |
| 36-55.9 MET-hours/week | 23.4 | 21.8 | 26.1 | 21.8 | 26.2 | 24.5 | 18.7 | 14.3 |
| 56+ MET-hours/week | 14.9 | 17.0 | 36.8 | 43.5 | 24.8 | 28.2 | 29.9 | 25.7 |
| **Vigorous-intensity** |  |  |  |  |  |  |  |  |
| 0-4.9 MET-hours/week | 15.4 | 22.7 | 34.5 | 39.0 | 26.7 | 31.9 | 29.5 | 31.4 |
| 5-18.9 MET-hours/week | 25.5 | 22.7 | 26.4 | 25.0 | 18.8 | 21.8 | 26.5 | 27.1 |
| 19-36.4 MET-hours/week | 28.7 | 22.0 | 20.6 | 22.1 | 22.3 | 22.9 | 23.9 | 15.7 |
| 36.5+ MET-hours/week | 30.3 | 32.7 | 18.5 | 14.0 | 32.2 | 23.4 | 20.1 | 25.7 |
