# Supplementary material for: Lifetime Physical Activity and the Risk of Non-Hodgkin Lymphoma
Source: Oxford University Press journal article supplement (doi:10.1158/1055-9965.epi-14-1303), 2015-04-30
Supplement: 10559965epi141303-sup-141305_1_supp_2848526_nj7svd.docx [file 10559965epi141303-sup-141305_1_supp_2848526_nj7svd.docx]

**Supplementary Table 2. Distribution of total, moderate-intensity and vigorous-intensity physical activity performed in specific age-periods by cases and controls in a case-control study conducted in British Columbia, Canada, 2000-2004**

|  | **Age Period** | | | | | | | | | | | | | |
| --- | --- | --- | --- | --- | --- | --- | --- | --- | --- | --- | --- | --- | --- | --- |
|  | **10-19 years** | | **20-29 years** | | **30-39 years** | | **40-49 years** | | **50-59 years** | | **60-69 years** | | **70-79 years** | |
|  | **Controls (n=818)** | **Cases (n=749)** | **Controls (n=815)** | **Cases (n=748)** | **Controls (n=775)** | **Cases (n=720)** | **Controls (n=696)** | **Cases (n=678)** | **Controls (n=580)** | **Cases (n=588)** | **Controls (n=392)** | **Cases (n=392)** | **Controls (n=188)** | **Cases (n=195)** |
| **Physical Activity** | **%** | **%** | **%** | **%** | **%** | **%** | **%** | **%** | **%** | **%** | **%** | **%** | **%** | **%** |
| **Total** |  |  |  |  |  |  |  |  |  |  |  |  |  |  |
| Quartile 1 | 24.9 | 26.0 | 25.3 | 29.4 | 24.0 | 25.8 | 24.7 | 26.3 | 25.5 | 27.6 | 25.3 | 27.0 | 26.1 | 31.8 |
| Quartile 2 | 25.3 | 25.8 | 25.5 | 20.6 | 26.5 | 25.0 | 26.0 | 23.7 | 25.7 | 26.0 | 25.0 | 18.9 | 23.9 | 17.4 |
| Quartile 3 | 25.3 | 23.0 | 24.9 | 22.1 | 25.0 | 21.4 | 24.6 | 21.7 | 24.7 | 22.1 | 25.5 | 26.5 | 27.1 | 28.2 |
| Quartile 4 | 24.4 | 25.2 | 24.3 | 27.9 | 24.5 | 27.8 | 24.7 | 28.3 | 24.1 | 24.3 | 24.2 | 27.6 | 22.9 | 22.6 |
| **Moderate-Intensity** |  |  |  |  |  |  |  |  |  |  |  |  |  |  |
| Quartile 1 | 23.7 | 22.4 | 22.9 | 23.3 | 24.5 | 27.9 | 24.6 | 26.5 | 24.8 | 25.3 | 23.5 | 21.9 | 25.0 | 29.2 |
| Quartile 2 | 25.1 | 26.8 | 24.8 | 25.4 | 25.7 | 23.2 | 25.3 | 24.0 | 24.5 | 24.7 | 26.5 | 23.7 | 23.9 | 20.5 |
| Quartile 3 | 25.9 | 25.6 | 27.0 | 25.3 | 24.5 | 22.9 | 25.3 | 20.5 | 25.9 | 22.3 | 25.5 | 26.3 | 25.5 | 23.6 |
| Quartile 4 | 25.3 | 25.1 | 25.3 | 26.1 | 25.3 | 26.0 | 24.9 | 28.9 | 24.8 | 27.7 | 24.5 | 28.1 | 25.5 | 26.7 |
| **Vigorous-Intensity** |  |  |  |  |  |  |  |  |  |  |  |  |  |  |
| None | *29.3* | 31.1 | *48.6* | 50.9 | *53.5* | 56.2 | *57.2* | 60.5 | *62.1* | 66.7 | *68.4* | 68.9 | *77.1* | 81.0 |
| Some | 70.7 | 68.9 | 51.4 | 49.1 | 46.5 | 43.8 | 42.8 | 39.5 | *37.9* | 33.3 | *31.6* | 31.1 | 22.9 | 19.0 |
