# Supplementary material for: Lifetime Physical Activity and the Risk of Non-Hodgkin Lymphoma
Source: Oxford University Press journal article supplement (doi:10.1158/1055-9965.epi-14-1303), 2015-04-30
Supplement: 10559965epi141303-sup-141305_1_supp_2848528_nj7svd.docx [file 10559965epi141303-sup-141305_1_supp_2848528_nj7svd.docx]

**Supplementary Figure 1: Physical activity questionnaire used in a case-control study of non-Hodgkin lymphoma conducted in British Columbia, Canada, 2000-2004**
